# Supplementary material for: Near-infrared-persistent luminescence/bioluminescence imaging tracking of transplanted mesenchymal stem cells in pulmonary fibrosis
Source: Royal Society of Chemistry journal article supplement (doi:10.1039/d0bm00063a), 2020-01-01
Supplement: d0bm00063a1.pdf [file d0bm00063a1.pdf]

**Supplementary information**

**Near-infrared-persistent luminescence/bioluminescence imaging tracking of  
transplanted mesenchymal stem cells in pulmonary fibrosis**

Yuyang Xia,<sup>a,b</sup> Hongying Bao,<sup>b</sup> Jie Huang,<sup>\*b</sup> Xiaodi Li,<sup>b</sup> Chenggong Yu,<sup>b</sup> Zhijun

Zhang,<sup>\*b</sup> Haishui Wang<sup>\*a</sup>

<sup>a</sup> *School of Chemistry and Chemical Engineering, South China University of  
Technology, Guangzhou 510641, P. R. China.*

<sup>b</sup> *CAS Key Laboratory of Nano-Bio Interface, Division of Nanobiomedicine,  
Suzhou Institute of Nano-Tech and Nano-bionics, Chinese Academy of Sciences,  
Suzhou 215123, P. R. China.*

\* Corresponding authors. E-mail: [jhuang2008@sinano.ac.cn](mailto:jhuang2008@sinano.ac.cn), Tel: 86-512-62872556,  
Fax: 86-512-62603079; E-mail: [zjzhang2007@sinano.ac.cn](mailto:zjzhang2007@sinano.ac.cn), Tel: 86-512-62872561,  
Fax: 86-512-62603079; E-mail: [wanghsh@scut.edu.cn](mailto:wanghsh@scut.edu.cn).

### In vivo PL and BL imaging control

Since the labeled nanoparticles were nearly completely metabolized after 30 days, the mice transplanted with the labeled stem cells for 30 days were used as blank controls in the experiment, in which the image of the BL control was taken 10 min after that of the PL control using the same anesthetized mouse.
